# Supplementary material
Source: Springer Nature journal article supplement (https://www.springermedizin.de/resource/supplementary/12885_2011_3006_MOESM3_ESM.pdf/9463488)

**Monolayer Normoxia**

**Spheroids**

**Monolayer Hypoxia**

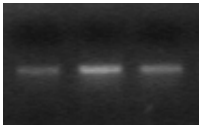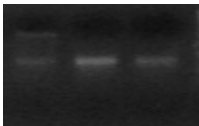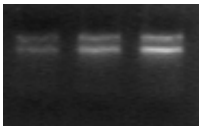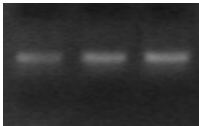

**PDK1**

**PGK1**

**VEGF**

**S14**

Supplement: MOESM3 [file 9463488]
